# Supplementary material
Source: publisher figshare collection journal article supplement (https://asha.figshare.com/articles/dataset/_/25511047)

## **Supplemental Material S3. Questionnaire.**

### **Speech Language Pathologists' Training, Clinical Experiences, and Self-Perceptions of Proficiency in Language and Literacy**

University of North Carolina at Chapel Hill

IRB Study #: 21-0666

Principal Investigator: Julia J. Yi

The purpose of this research study is to examine speech language pathologists' training in, clinical experiences of, and self-perceptions of proficiency in: (a) language and literacy assessment and (b) language and literacy treatment. You are being asked to take part in this survey study because you are a speech-language pathologist in the U.S. This survey is open to ALL speech-language pathologists (SLPs) who: (a) work in the U.S. and (b) received training at a SLP graduate program in the U.S. or its territories.

The estimated time to complete this survey is **3-10 minutes**. We expect that at least 383 speech-language pathologists will take part in this research study. Being in a research study is completely voluntary. You can choose not to answer any question you do not wish to answer. You can also choose to stop taking the survey at any time. You must be at least 18 years old to participate. If you are younger than 18 years old, please stop now. The possible risks involved in completing this survey are minimal and no greater than those encountered in everyday life. To protect your identity as a research subject, no identifiable information will be collected. Your responses will be anonymous. To this end, there are no foreseen risks of breaches of confidentiality since no identifiable information will be collected from the participants and no IP address or location address will be collected through Qualtrics though there is a small, but possible risk.

If you have any questions about this research, please contact Julia Yi by emailing [juliyi@med.unc.edu](mailto:juliyi@med.unc.edu). If you have questions or concerns about your rights as a research subject, you may contact the UNC Institutional Review Board at 919-966-3113 or by email to [IRB\\_subjects@unc.edu](mailto:IRB_subjects@unc.edu). **Your time and participation are greatly appreciated!**

**Q1.2 Do you understand and agree with the following?**

*My responses are confidential and my participation with this survey is voluntary.*

Yes

No

**Q1.3 Are you a speech-language pathologist who received a Master's degree in speech language pathology from a program in the United States?**

Yes

No

Skip To: End of Survey If: *Are you a speech-language pathologist who received a Master's degree in speech language pathology... = No*

**Q1.4 Are you a speech-language pathologist currently working in the United States?**

Yes

No

**Q3.1 Do you currently work with school-age children or adolescents ages 5-21 years old?**

Yes

No

Skip To Q3.3 If: *Do you currently work with school-age children or adolescents ages 5-21 years old? = Yes*

Skip To End of Survey If: *Do you currently work with school-age children or adolescents ages 5-21 years old? = No*

**Q3.2 Section 2: This section will ask you about your clinical experiences pertaining to literacy.**

**Q3.3 Which setting do you work in currently? Please check all that apply.**

Elementary School

Middle School

High School

Private Practice/Clinic

Hospital

Other (specify): \_\_\_\_\_

**Q3.4 In which state or territory do you currently work?**

[Dropdown of U.S. states and territories]

**Q3.5 Do you assess and/or treat oral language currently?**

Yes

No

Display Next Question If: *Do you assess and/or treat oral language currently? = Yes*

**Q3.8 What percentage of your work hours do you typically spend on treating or assessing oral language weekly?**

0 10 20 30 40 50 60 70 80 90 100

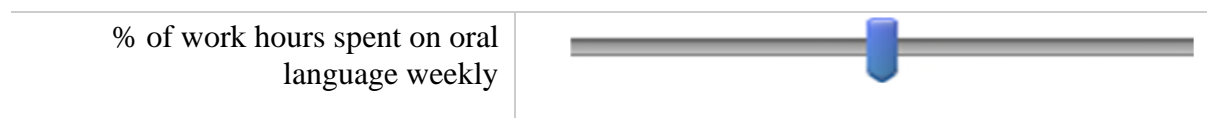

Display Next Question If: *Do you assess and/or treat oral language currently? = Yes*

**Q3.7 Do you write and track oral language goals for the students on your caseload?**

Yes

No

**Q3.9 Do you assess and/or treat literacy currently?**

Yes

No

Display Next Question If: *Do you assess and/or treat literacy currently? = Yes*

**Q3.12 What percentage of your work hours do you typically spend on treating or assessing literacy weekly?**

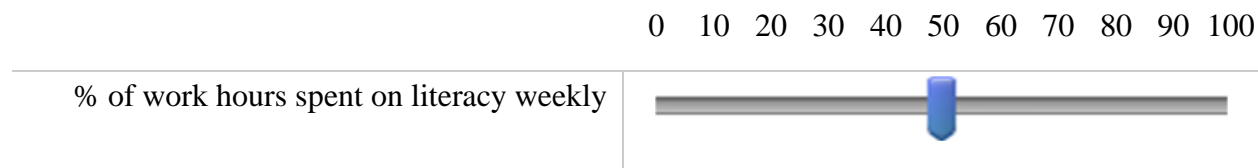

Display Next Question If: *Do you assess and/or treat literacy currently? = Yes*

**Q4.1 Section 3: This section will ask you about your perceived proficiencies and areas of needed growth pertaining to the knowledge of assessment and treatment of language and literacy.**

**Q4.2 As a reminder, the definitions of literacy concepts as used in this survey are:**

- *Phonological awareness*: an awareness of the units of oral language including recognizing rhymes, words in sentences, syllables in words, and sounds in words
- *Decoding/encoding of words*: reading and spelling of words
- *Reading fluency*: the ability to read with accuracy, speed, and expression
- *Reading comprehension*: the reader's ability to understand the text they read
- *Written language*: the text that the writer produces to communicate thought (i.e., written sentences/paragraphs)

### Q4.3 Complete this statement with one of the choices.

I feel proficiently knowledgeable to ASSESS:

|                                                       | Strongly Disagree | Disagree | Neutral | Agree | Strongly Agree |
|-------------------------------------------------------|-------------------|----------|---------|-------|----------------|
| oral language                                         |                   |          |         |       |                |
| decoding and encoding (reading and spelling of words) |                   |          |         |       |                |
| phonological/phonemic awareness                       |                   |          |         |       |                |
| reading fluency                                       |                   |          |         |       |                |
| reading comprehension                                 |                   |          |         |       |                |
| written language                                      |                   |          |         |       |                |

I feel proficiently knowledgeable to TREAT:

|                                                       | Strongly Disagree | Disagree | Neutral | Agree | Strongly Agree |
|-------------------------------------------------------|-------------------|----------|---------|-------|----------------|
| oral language                                         |                   |          |         |       |                |
| decoding and encoding (reading and spelling of words) |                   |          |         |       |                |
| phonological/phonemic awareness                       |                   |          |         |       |                |
| reading fluency                                       |                   |          |         |       |                |
| reading comprehension                                 |                   |          |         |       |                |
| written language                                      |                   |          |         |       |                |

#### Q4.8 To what extent do you agree with these statements?

|                                                                                                      | Never<br>0                                                                          | Sometimes<br>50 | Always<br>100 |
|------------------------------------------------------------------------------------------------------|-------------------------------------------------------------------------------------|-----------------|---------------|
| Literacy is within the SLP's scope of practice.                                                      |  |                 |               |
| It is the SLP's role and responsibility to assess <i>reading</i> .                                   |  |                 |               |
| It is the SLP's role and responsibility to assess <i>writing</i> .                                   |  |                 |               |
| It is the SLP's role and responsibility to treat <i>reading</i> .                                    |  |                 |               |
| It is the SLP's role and responsibility to treat <i>writing</i> .                                    |  |                 |               |
| It is equally important for SLPs to help clients with their literacy as much as their oral language. |  |                 |               |

Display Next Question If: *Do you assess and/or treat literacy currently?* = *Yes*

**Q4.9 Section 4: This section will ask you about the language and literacy profiles of the students on your current workload.**

\*Please note that the total percentage of the following questions do not have to equal 100% since there may be students who struggle in multiple areas.\*

**Q5.1 What percentage of the students on your workload struggle with the following:**

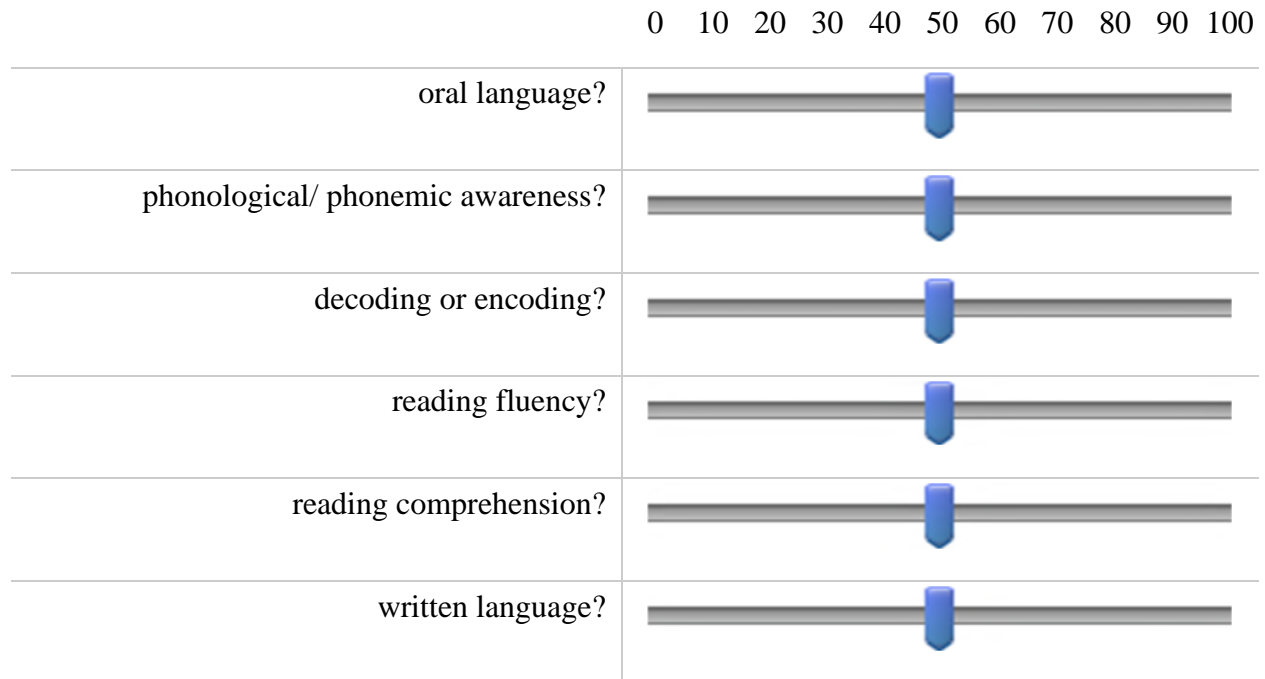

Supplement: Supplementary file 1 [file 1]
