# Supplementary material
Source: publisher figshare collection journal article supplement (https://asha.figshare.com/articles/dataset/_/25511047)
Supplement: Supplementary file 3 [file 1]

## Supplemental Material S2. Content validity document.

### *CONTENT VALIDITY INDEX*

Dear SLP expert,

Thank you for helping with the content validation of this survey. Content validity is the “degree to which an instrument is representative of the topic and process being investigated” (Colton & Covert, 2007). For this study, I will be using the content validity index to quantify your assessment of content validity. This requires you (the content experts) to rate the questionnaire items on their clarity and its relevancy to the constructs that I seek to measure through this study.

To help you understand the overall construct of this study, the big question that this survey seeks to answer is: *what is the current state of literacy in speech-language pathology?*

This big question will be answered by examining these 4 topics: (a) the extent of pre-service and in-service trainings and preparation related to literacy, (b) SLP’s clinical experiences pertaining to literacy, (c) self-perceptions of competency and areas of needed growth in literacy, and (d) the literacy profiles of students on their caseloads. There are 2 additional RQs that compare the respondents relative focus on oral language and literacy and that compare the responses of SLPs who work in school versus non-school settings.

The main RQ is: *What is the state of literacy in the field of SLP as reported by SLPs?*

The additional RQs across are:

1. *Is there a difference between oral language and literacy across the domains?*
2. *Are there differences in the responses to survey items between SLPs who report working with children and adolescents in school versus non-school settings?*

The survey is organized by sections that relate to separate topics. Please read the topic for each section and review the associated RQ. Then rate from 1-4 how relevant each item is to the topic and the RQs using the rating scale below:

| <b><u>Relevancy:</u></b>                                           | <b><u>Clarity:</u></b>                                          |
|--------------------------------------------------------------------|-----------------------------------------------------------------|
| 1 = This item is <i>not relevant</i> .                             | 1 = This item is <i>not clear</i> .                             |
| 2 = This item is <i>somewhat relevant</i> and needs some revision. | 2 = This item is <i>somewhat clear</i> and needs some revision. |
| 3 = This item is <i>quite relevant</i> but needs minor revision.   | 3 = This item is <i>quite clear</i> but needs minor revision.   |
| 4 = This item is <i>very relevant</i> .                            | 4 = This item is <i>very clear</i> .                            |

|                                                                                                                                                                                              | <b>Relevancy:<br/>Rate 1-4.</b> | <b>Clarity:<br/>Rate 1-4.</b> |
|----------------------------------------------------------------------------------------------------------------------------------------------------------------------------------------------|---------------------------------|-------------------------------|
| Which setting do you work in currently?                                                                                                                                                      |                                 |                               |
| Which state or territory do you work in currently?                                                                                                                                           |                                 |                               |
| Do you assess and/or treat literacy currently?                                                                                                                                               |                                 |                               |
| What percentage of your current workload is related to literacy (e.g., assessing literacy, treating students on literacy goals, providing literacy support through RTI)?                     |                                 |                               |
| What is the average number of hours in a week that you spend on treating or assessing literacy?                                                                                              |                                 |                               |
| Do you assess and/or treat oral language currently?                                                                                                                                          |                                 |                               |
| What percentage of your current workload is related to oral language (e.g., assessing oral language, treating students on oral language goals, providing oral language support through RTI)? |                                 |                               |
| What is the average number of hours in a week that you spend on treating or assessing oral language?                                                                                         |                                 |                               |

What are SLPs' self-perceptions of their: (a) competency and (b) areas of needed growth regarding assessment and treatment of literacy?

|                                                                                                                                                                                                                                                                                                                                                                                                                                                                                                                               | <b>Relevancy:<br/>Rate 1-4.</b> | <b>Clarity:<br/>Rate 1-4.</b> |
|-------------------------------------------------------------------------------------------------------------------------------------------------------------------------------------------------------------------------------------------------------------------------------------------------------------------------------------------------------------------------------------------------------------------------------------------------------------------------------------------------------------------------------|---------------------------------|-------------------------------|
| Complete this statement with one of the choices (Likert scale): This how I feel about assessing...                                                                                                                                                                                                                                                                                                                                                                                                                            |                                 |                               |
| (a) oral language.                                                                                                                                                                                                                                                                                                                                                                                                                                                                                                            |                                 |                               |
| (b) decoding and encoding.                                                                                                                                                                                                                                                                                                                                                                                                                                                                                                    |                                 |                               |
| (c) phonological/phonemic awareness.                                                                                                                                                                                                                                                                                                                                                                                                                                                                                          |                                 |                               |
| (d) reading fluency.                                                                                                                                                                                                                                                                                                                                                                                                                                                                                                          |                                 |                               |
| (e) reading comprehension.                                                                                                                                                                                                                                                                                                                                                                                                                                                                                                    |                                 |                               |
| (f) writing.                                                                                                                                                                                                                                                                                                                                                                                                                                                                                                                  |                                 |                               |
| Complete this statement with one of the choices (Likert scale): This how I feel about treating...                                                                                                                                                                                                                                                                                                                                                                                                                             |                                 |                               |
| (a) oral language.                                                                                                                                                                                                                                                                                                                                                                                                                                                                                                            |                                 |                               |
| (b) decoding and encoding.                                                                                                                                                                                                                                                                                                                                                                                                                                                                                                    |                                 |                               |
| (c) phonological/phonemic awareness.                                                                                                                                                                                                                                                                                                                                                                                                                                                                                          |                                 |                               |
| (d) reading fluency.                                                                                                                                                                                                                                                                                                                                                                                                                                                                                                          |                                 |                               |
| (e) reading comprehension.                                                                                                                                                                                                                                                                                                                                                                                                                                                                                                    |                                 |                               |
| (f) writing.                                                                                                                                                                                                                                                                                                                                                                                                                                                                                                                  |                                 |                               |
| Which of these statements do you agree with? (Select all the statements that you agree with.) <ul style="list-style-type: none"> <li><input type="checkbox"/> Literacy is within my scope of practice as a speech language pathologist.</li> <li><input type="checkbox"/> It is my role and responsibility to assess and treat reading and writing.</li> <li><input type="checkbox"/> My responsibility in helping clients with written language/literacy is equally important as helping them with oral language.</li> </ul> |                                 |                               |

What are the literacy profiles (i.e., challenges in phonological awareness, decoding, reading fluency, and/or reading comprehension) of the students that SLPs currently serve?

|                                                                 | <b>Relevancy:<br/>Rate 1-4.</b> | <b>Clarity:<br/>Rate 1-4.</b> |
|-----------------------------------------------------------------|---------------------------------|-------------------------------|
| What percentage of the students on your workload struggle with: |                                 |                               |
| (a) oral language.                                              |                                 |                               |
| (b) decoding and encoding.                                      |                                 |                               |
| (c) phonological/phonemic awareness.                            |                                 |                               |
| (d) reading fluency.                                            |                                 |                               |
| (e) reading comprehension.                                      |                                 |                               |
| (f) writing.                                                    |                                 |                               |

## References

- Yusoff, M. S. B. (2019). ABC of content validation and content validity index calculation. *Education in Medicine Journal*, 11(2), 49-54. <https://doi.org/10.21315/eimj2019.11.2.6>
- Zamanzadeh, V., Ghahramanian, A., Rassouli, M., Abbaszadeh, A., Alavi-Majd, H., & Nikanfar, A. R. (2015). Design and implementation content validity study: Development of an instrument for measuring patient-centered communication. *Journal of Caring Sciences*, 4(2), 165–178. <https://doi.org/10.15171/jcs.2015.017>
